# Supplementary material
Source: PubMed Central journal article supplement (PMC7249463)
Supplement: Supp_Fig1.pdf [file Supp_Fig1.pdf]

## Supplementary Data

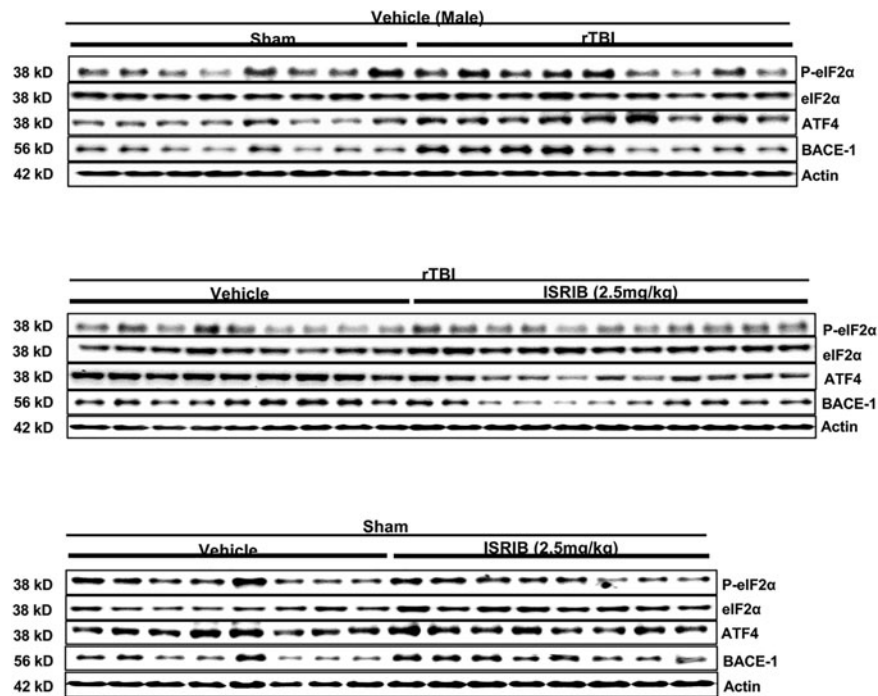

**SUPPLEMENTARY FIG. S1.** Integrated stress response (ISR) pathway activation marker raw data. Western blot analysis of hemibrains for ISR activation: p-eIF2 $\alpha$ , total eIF2 $\alpha$ , ATF4, BACE-1, and actin protein. Analysis was performed on multiple blots; raw data shown here. Protein levels were quantified to total eIF2 $\alpha$  (p-eIF2 $\alpha$ ) or actin (ATF4, BACE-1) levels and standardized to sham + vehicle group. rTBI, repetitive traumatic brain injury; ISRIB, integrated stress response inhibitor.
