# Supplementary material
Source: PubMed Central journal article supplement (PMC7249463)
Supplement: Supp_Table4-5.pdf [file Supp_Table4-5.pdf]

SUPPLEMENTARY TABLE S4. LIST  
OF ELECTROPHYSIOLOGY REAGENTS

| <i>Reagents<br/>for Patching</i> | <i>Company</i>               | <i>Product #</i> |
|----------------------------------|------------------------------|------------------|
| Sucrose                          | Sigma-Aldrich, St. Louis, MO | S5016            |
| NaH <sub>2</sub> PO <sub>4</sub> | Sigma-Aldrich, St. Louis, MO | S9638            |
| NaHCO <sub>3</sub>               | Sigma-Aldrich, St. Louis, MO | S6014            |
| KCl                              | Sigma-Aldrich, St. Louis, MO | P9333            |
| NaCl                             | Sigma-Aldrich, St. Louis, MO | S9888            |
| CaCl <sub>2</sub>                | Sigma-Aldrich, St. Louis, MO | 223506           |
| MgCl <sub>2</sub>                | Sigma-Aldrich, St. Louis, MO | M9272            |
| Dextrose                         | Sigma-Aldrich, St. Louis, MO | G5767            |
| Ascorbic acid                    | Sigma-Aldrich, St. Louis, MO | A5960            |
| Sodium pyruvate                  | Sigma-Aldrich, St. Louis, MO | P5280            |
| K-gluconate                      | Sigma-Aldrich, St. Louis, MO | P1847            |
| HEPES                            | Sigma-Aldrich, St. Louis, MO | H3375            |
| MgATP                            | Sigma-Aldrich, St. Louis, MO | A9187            |
| Na3GTP                           | Sigma-Aldrich, St. Louis, MO | G8877            |
| 2K-phosphocreatine               | Millipore, Burlington, MA    | 237911           |
| Biocytin                         | Tocris, Bristol, UK          | 3349             |

SUPPLEMENTARY TABLE S5. INTRINSIC PROPERTIES OF TYPE A LAYER V PYRAMIDAL NEURONS

| <i>Variables</i>                   | <i>Type A sham</i>       | <i>Type A rTBI</i>        | <i>Type A rTBI + ISRIB</i> | <i>p</i>                |
|------------------------------------|--------------------------|---------------------------|----------------------------|-------------------------|
| <b>Action potential properties</b> |                          |                           |                            |                         |
| Half width (msec)                  | *0.917 (0.859–1.008)     | *0.858 (0.823–0.966)      | *0.850 (0.792–0.916)       | 0.2430 (Kruskal-Wallis) |
| Amplitude (mV)                     | 78.77 (1.87)             | 78.23 (1.90)              | 78.20 (1.90)               | 0.9704 (one-way ANOVA)  |
| Threshold (mV)                     | *-39.25 (-39.76- -36.15) | *-39.14 (-40.97- - 37.14) | *-39.33 (-40.69- -36.19)   | 0.7586 (Kruskal-Wallis) |
| Rising slope (mv/s)                | 331.3 (16.8)             | 324.8 (16.4)              | 333.4 (16.3)               | 0.9353 (one-way ANOVA)  |
| Falling slope (mv/s)               | -79.86 (3.33)            | -86.89 (4.14)             | -89.83 (4.22)              | 0.1666 (one-way ANOVA)  |
| Spike AHP (mV)                     | *10.80 (9.61–12.44)      | *10.41 (7.97–12.74)       | *11.46 (9.54–12.73)        | 0.3549 (Kruskal-Wallis) |
| Adaptation index                   | *2.86 (2.86–3.50)        | *2.95 (2.84–4.30)         | *3.20 (2.83– 4.37)         | 0.9614 (Kruskal-Wallis) |
| F/I slope (Hz/pA)                  | *0.287 (0.242–0.311)     | *0.268 (0.212–0.305)      | *0.278 (0.246–0.291)       | 0.6500 (Kruskal-Wallis) |
| <b>Subthreshold responses</b>      |                          |                           |                            |                         |
| Sag+rebound+AHP (mV)               | *8.81 (7.61-11.81)       | *8.12 (7.53-8.71)         | *8.893 (7.16- 10.16)       | 0.2097 (Kruskal-Wallis) |
| Rebound AHP                        | 3.06 (0.23)              | 3.13 (0.13)               | 3.24 (0.25)                | 0.8362 (one-way ANOVA)  |
| <b>Passive properties</b>          |                          |                           |                            |                         |
| Resting potential (mV)             | *-62 (-65- -60)          | *-63 (-66- -60)           | *-65 (-66- -64)            | 0.2066 (Kruskal-Wallis) |
| Membrane resistance (MW)           | *108.2 (88.6–125.7)      | *82.81 (73.6–111.1)       | *79.97 (65.3–105.7)        | 0.2015 (Kruskal-Wallis) |

rTBI, repetitive traumatic brain injury; ISRIB, integrated stress response inhibitor; ANOVA, analysis of variance; AHP, afterhyperpolarization. Values are mean (standard error of the mean) or \*median (95% confidence interval). Statistical test is indicated with associated *p*-value.
