# Supplementary material
Source: PubMed Central journal article supplement (PMC7249463)
Supplement: Supp_Table6.pdf [file Supp_Table6.pdf]

SUPPLEMENTARY TABLE S6. INTRINSIC PROPERTIES OF TYPE B LAYER V PYRAMIDAL NEURONS

| <i>Variables</i>                   | <i>Type B sham</i>   | <i>Type B rTBI</i>   | <i>Type B rTBI + ISRIB</i> | <i>p</i>                |
|------------------------------------|----------------------|----------------------|----------------------------|-------------------------|
| <b>Action potential properties</b> |                      |                      |                            |                         |
| Half width (msec)                  | *0.988 (0.906-1.262) | *1.050 (0.941-1.184) | *1.131 (1.033-1.213)       | 0.3524 (Kruskal-Wallis) |
| Amplitude (mV)                     | 71.01(2.27)          | 73.66 (1.50)         | 70.44 (1.72)               | 0.3951 (one- way ANOVA) |
| Threshold (mV)                     | -35.65 (1.11)        | -36.93 (0.89)        | -36.09 (1.08)              | 0.6753 (one- way ANOVA) |
| Rising slope (mv/s)                | 266.8 (21.8)         | 279.3 (13.1)         | 251.7 (12.6)               | 0.4400 (one- way ANOVA) |
| Falling slope (mv/s)               | -64.46 (5.44)        | -65.44 (4.17)        | -60.53 (3.04)              | 0.6688 (one- way ANOVA) |
| Spike AHP (mV)                     | 13.16 (0.63)         | 11.76 (0.77)         | 11.65 (0.62)               | 0.2648 (one- way ANOVA) |
| Adaptation index                   | *2.86 (2.69–3.64)    | *3.26 (2.88–3.91)    | *3.51 (3.06–4.23)          | 0.4252 (Kruskal-Wallis) |
| F/I slope (Hz/pA)                  | 0.236 (0.15)         | 0.221 (0.021)        | 0.244 (0.018)              | 0.6597 (one- way ANOVA) |
| <b>Subthreshold responses</b>      |                      |                      |                            |                         |
| Sag+rebound +AHP (mV)              | 4.47 (0.48)          | 3.60 (0.40)          | 3.86 (0.42)                | 0.3794 (one-way ANOVA)  |
| Rebound AHP                        | 1.24 (0.21)          | 1.48 (0.20)          | 1.42 (0.26)                | 0.7607 (one-way ANOVA)  |
| <b>Passive properties</b>          |                      |                      |                            |                         |
| Resting potential (mV)             | -64 (2)              | -67 (1)              | -64 (2)                    | 0.3267 (one-way ANOVA)  |
| Membrane resistance (MW)           | 175.0 (21.2)         | 199.9 (23.5)         | 177.9 (18.4)               | 0.6588 (one-way ANOVA)  |
| Time constant                      | 24.47 (1.56)         | 26.18 (2.03)         | 23.98 (1.91)               | 0.6771 (one-way ANOVA)  |

rTBI, repetitive traumatic brain injury; ISRIB, integrated stress response inhibitor; ANOVA, analysis of variance; AHP, afterhyperpolarization. Values are mean (standard error of the mean) or \*median (95% confidence interval). Statistical test is indicated with associated *p*-value.
